# Supplementary figures and images for: Large-Scale Analysis of X Inactivation Variations between Primed and Naïve Human Embryonic Stem Cells
Source: MDPI journal article supplement (doi:10.3390/cells11111729), 2022-05-24

A

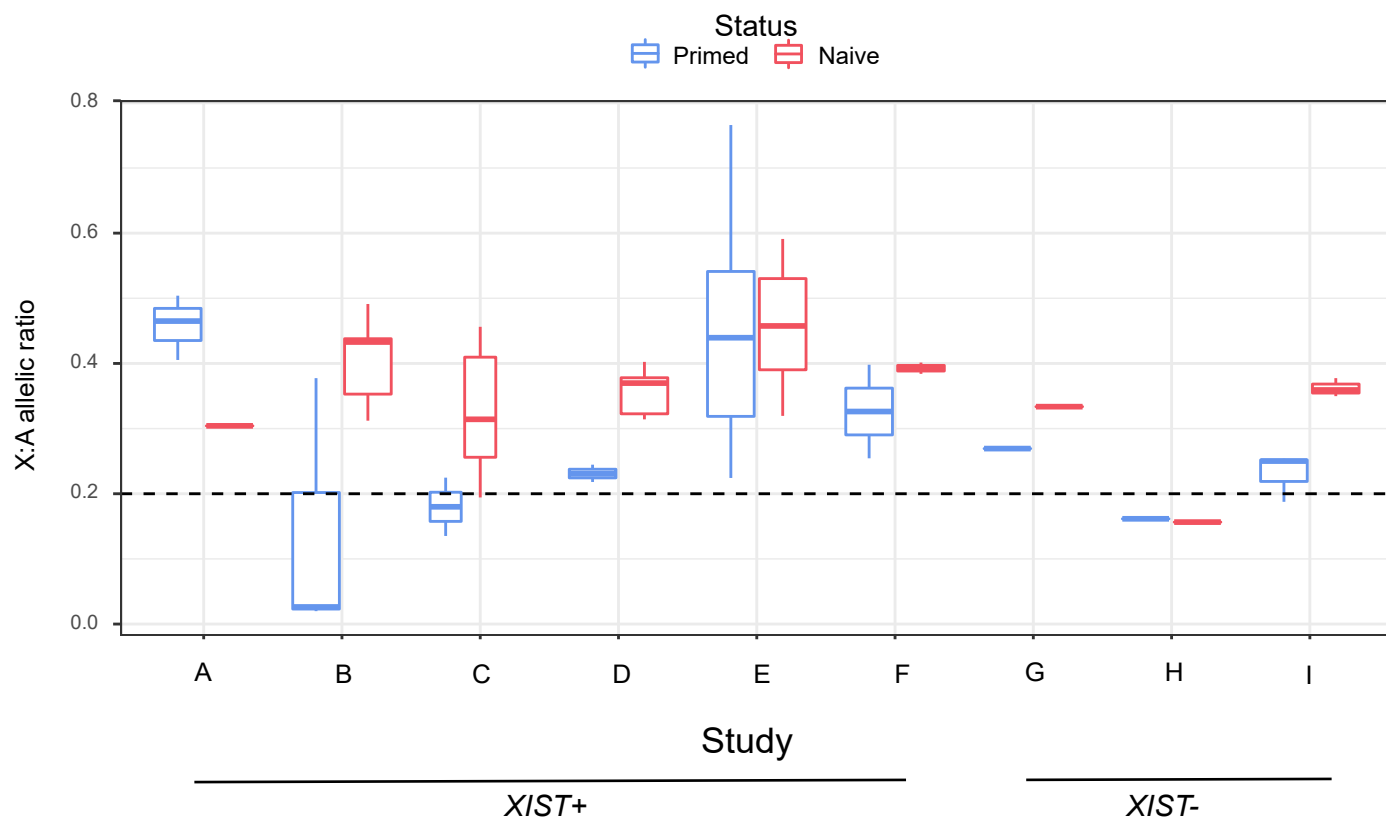

B

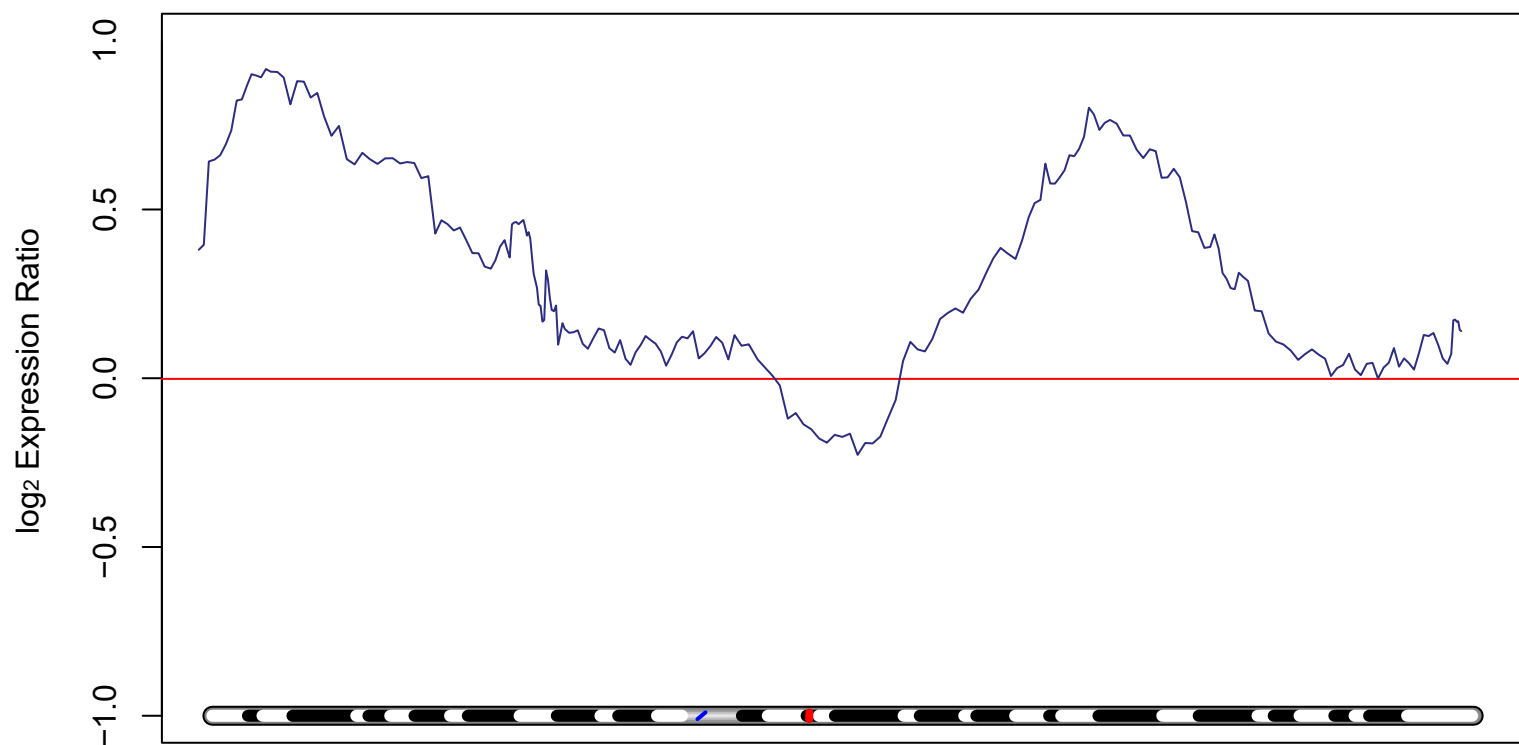

Supplement: s1 [file s1]

A

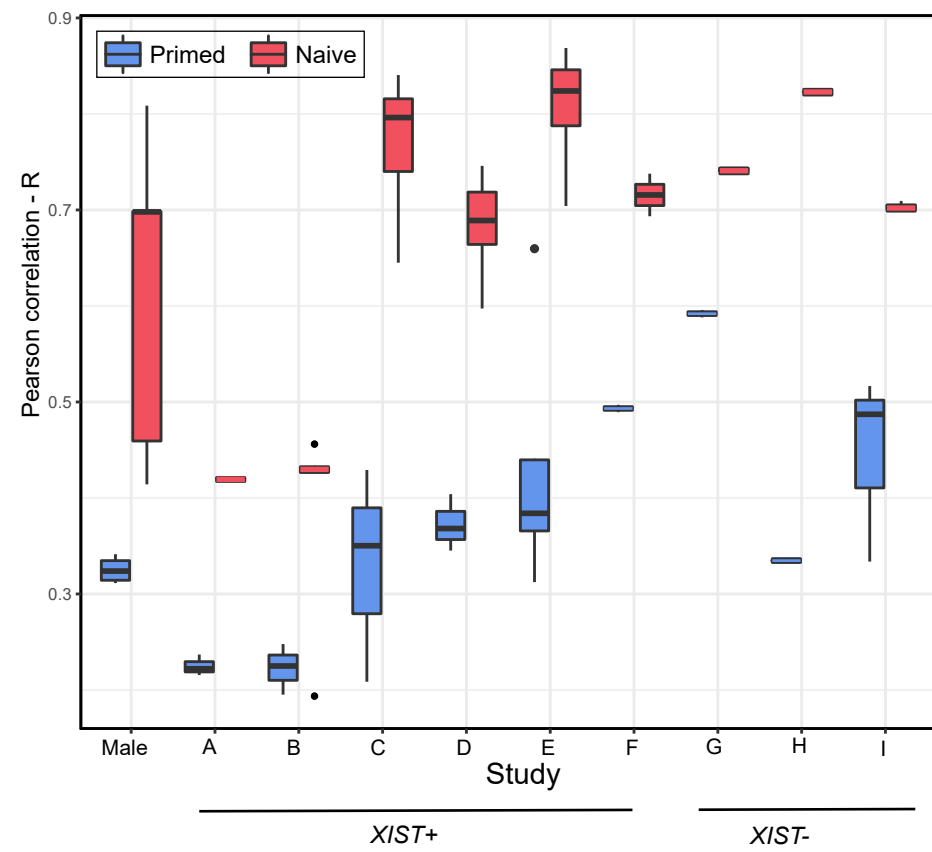

B

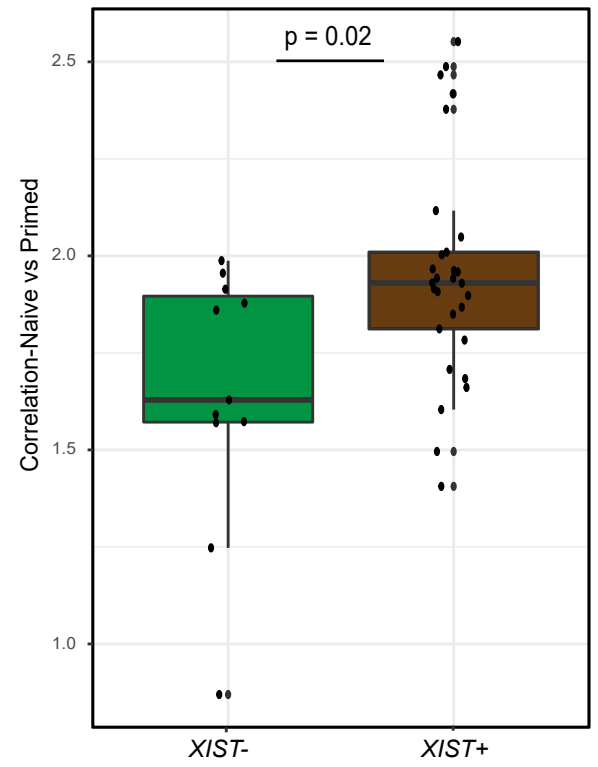

Supplement: s1 [file s1]

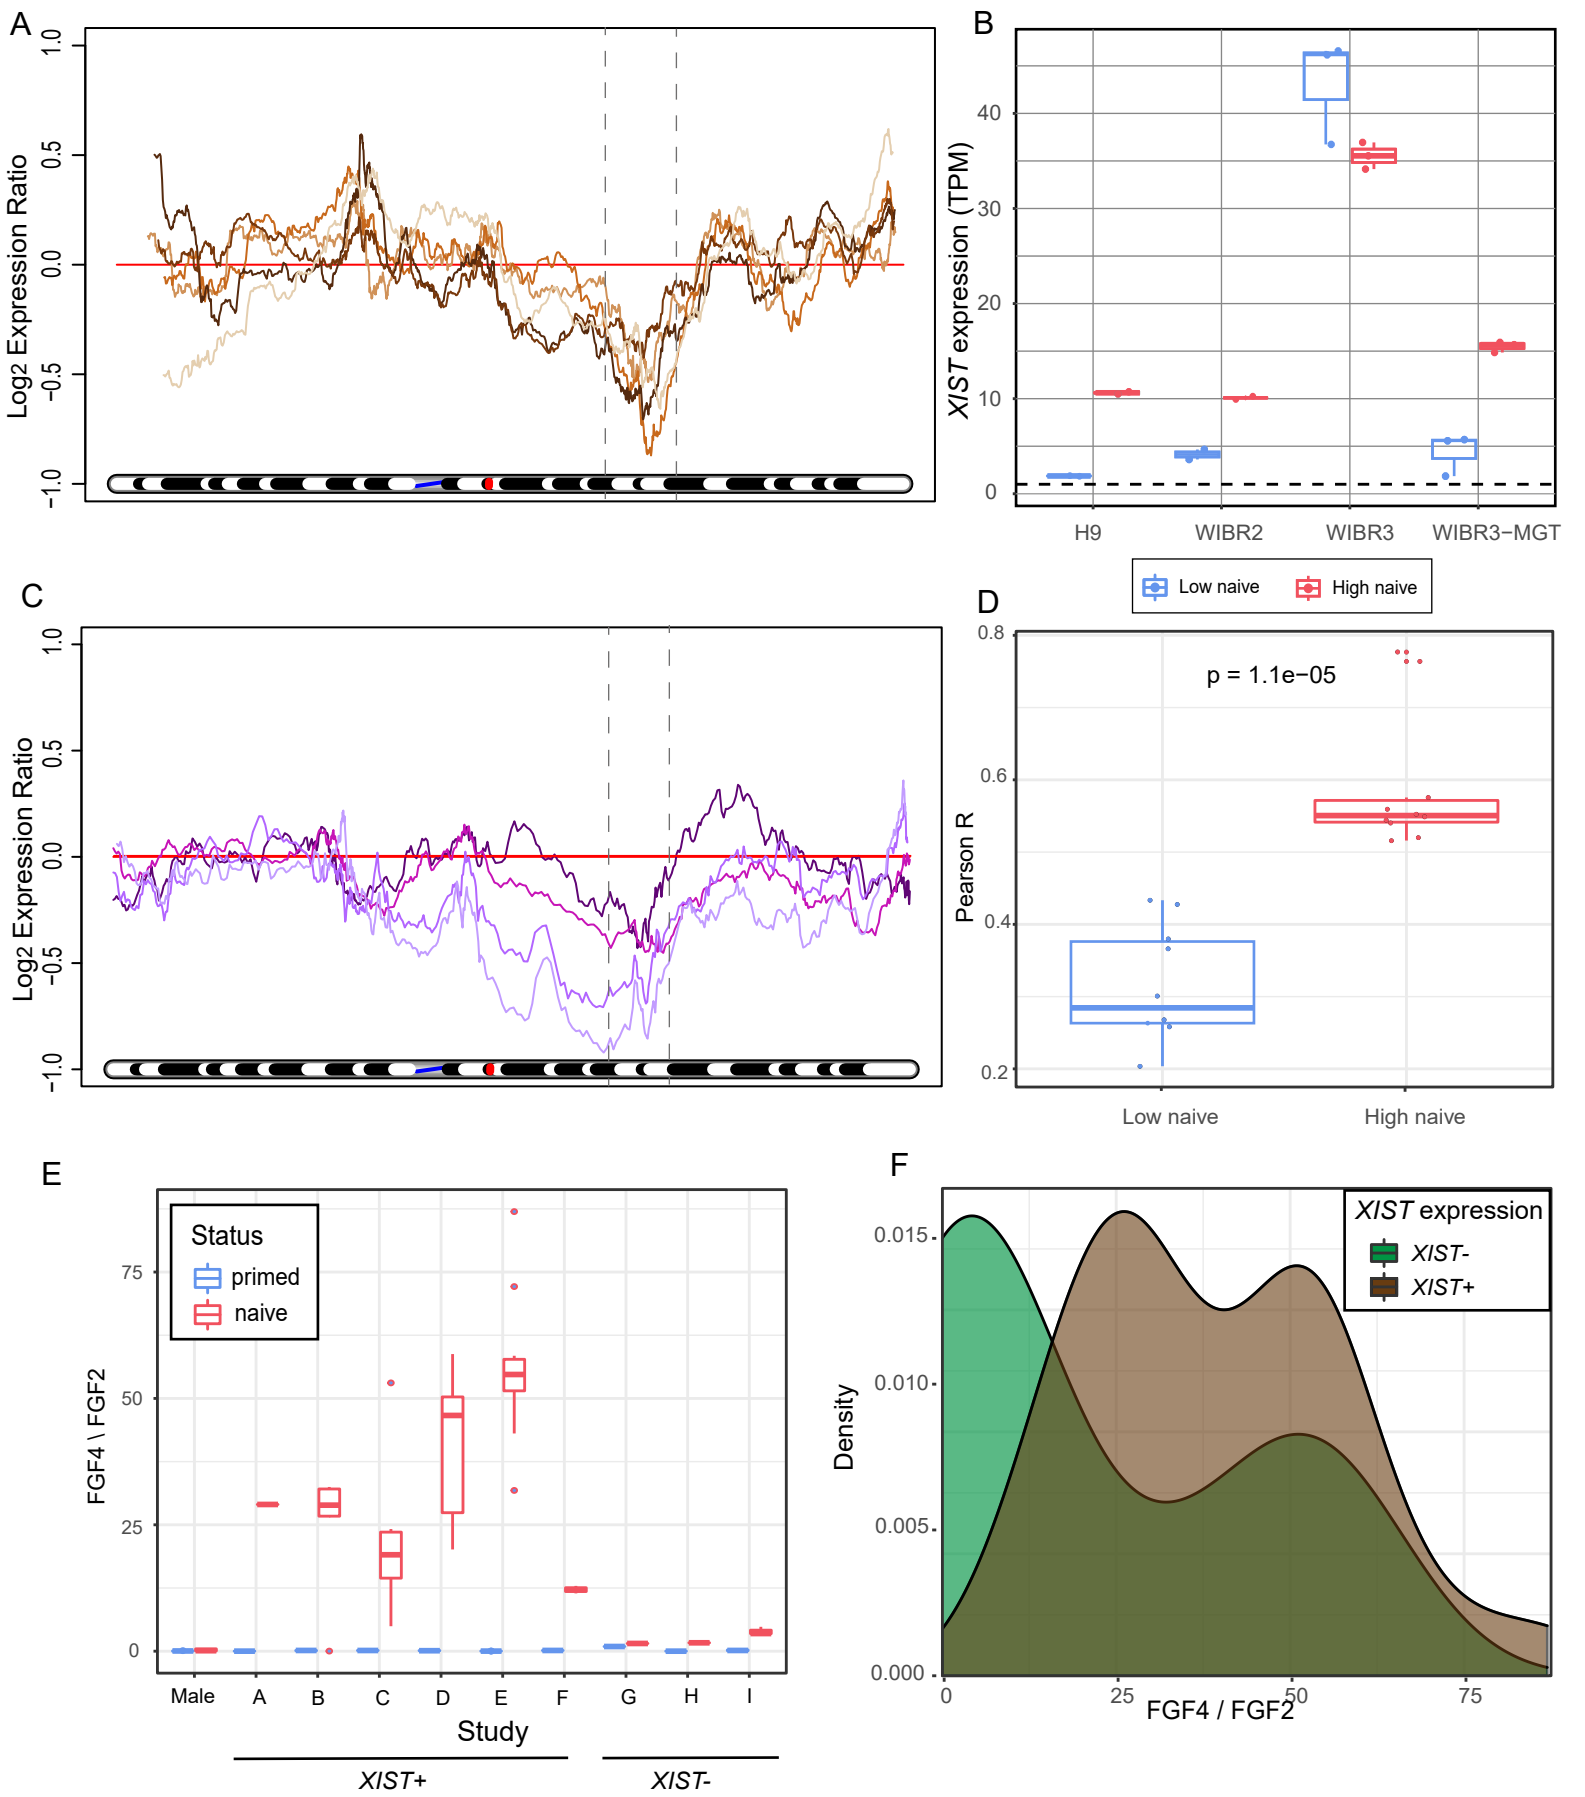

Supplement: s1 [file s1]
